# Supplementary material
Source: publisher figshare collection journal article supplement (https://acs.figshare.com/ndownloader/files/4480252)
Supplement: Supplementary file 1 [file 4480252]

data_Zn(bpb)

# 1. SUBMISSION DETAILS

_publ_contact_author_name         'Simona Galli'
_publ_contact_author_address
;
Dipartimento di Scienze Chimiche e Ambientali
Universita' degli Studi dell'Insubria
Via Valleggio, 11
22100 Como - Italy
;
_publ_contact_author_email        'simona.galli@uninsubria.it'
_publ_contact_author_fax          '+39-031-326230'
_publ_contact_author_phone        '+39-031-326227'

_publ_requested_journal           'JACS'
_publ_requested_category          ?

_publ_contact_letter
;?
;

# 2. PROCESSING SUMMARY (IUCr Office Use Only)

_journal_date_recd_electronic     ?
_journal_date_to_coeditor         ?
_journal_date_from_coeditor       ?
_journal_date_accepted            ?
_journal_date_printers_first      ?
_journal_date_printers_final      ?
_journal_date_proofs_out          ?
_journal_date_proofs_in           ?
_journal_coeditor_name            ?
_journal_coeditor_code            ?
_journal_coeditor_notes            
; ?
;
_journal_techeditor_code          ?
_journal_paper_category           ?
_iucr_compatibility_tag           ?
_journal_techeditor_notes          
; ?
;
_journal_coden_ASTM               ?
_journal_name_full                ?
_journal_year                     ?
_journal_volume                   ?
_journal_issue                    ?
_journal_page_first               ?
_journal_page_last                ?
_journal_suppl_publ_number        ?
_journal_suppl_publ_pages         ?


# 4.1.1 CRYSTAL DATA

_chemical_name_systematic
;
1,4-bis(4-pyrazolato)-benzene zinc(ii) bis-benzonitrile solvate
;

_chemical_name_mineral ?
_chemical_name_common          ?
_chemical_formula_moiety       'C12 H8 N4 Zn, (C7 H5 N) 2'
_chemical_formula_structural   ?
_chemical_formula_analytical   ?
_chemical_formula_sum          'C26 H18 N6 Zn'
_chemical_formula_weight       479.86
_chemical_melting_point        ?
_chemical_compound_source      'synthesis'

loop_
_atom_type_symbol
_atom_type_description
_atom_type_scat_source


C  C  'International Tables for Crystallography (Vol. IV)'
H  H  'International Tables for Crystallography (Vol. IV)'
N  N  'International Tables for Crystallography (Vol. IV)'
Zn Zn 'International Tables for Crystallography (Vol. IV)'


# 4.1.2 POWDER SPECIMEN AND CRYSTAL DATA

_space_group_crystal_system         tetragonal
_space_group_name_H-M_alt          'P42/mmc'
_space_group_name_Hall        ?

_cell_length_a  13.26573(67)
_cell_length_b  13.26573(67)
_cell_length_c  7.2474(11)
_cell_angle_alpha 90
_cell_angle_beta  90
_cell_angle_gamma 90
_cell_volume 1275.40(24)

loop_
_symmetry_equiv_pos_as_xyz
 '-x, -y, -z'
 '-x, -y, z'
 '-x, y, -z'
 '-x, y, z'
 '-y, -x, -z+1/2'
 '-y, -x, z+1/2'
 '-y, x, -z+1/2'
 '-y, x, z+1/2'
 'y, -x, -z+1/2'
 'y, -x, z+1/2'
 'y, x, -z+1/2'
 'y, x, z+1/2'
 'x, -y, -z'
 'x, -y, z'
 'x, y, -z'
 'x, y, z'


_cell_formula_units_Z          2
_cell_measurement_temperature  298

_pd_calibration_special_details
; ?
;
_cell_special_details
; ?
;

_exptl_crystal_density_diffrn   1.250
_exptl_crystal_density_meas     ?
_exptl_crystal_density_method   ?
_exptl_crystal_F_000            492

# The next three fields give the specimen dimensions in mm.
# The equatorial plane contains the incident and diffracted beam.

_pd_spec_size_axial               15     # perpendicular to
                                         # equatorial plane

_pd_spec_size_equat               20     # parallel to
                                         # scattering vector
                                         # in transmission

_pd_spec_size_thick               0.2    # parallel to
                                         # scattering vector
                                         # in reflection

# The next five fields are character fields that describe the specimen.

_pd_spec_mounting
;
packed powder pellet
;
_pd_spec_mount_mode     'reflection'    # options are reflection
                                          # or transmission

_pd_spec_shape          'flat_sheet'    # options are cylinder
                                          # flat_sheet or irregular

_pd_char_particle_morphology ?

_pd_char_colour     'white'       # use ICDD colour descriptions

# The next four fields are normally only needed for transmission experiments.

_exptl_absorpt_coefficient_mu     ?
_exptl_absorpt_correction_type    ?
_exptl_absorpt_correction_T_min   ?
_exptl_absorpt_correction_T_max   ?


# 4.1.3 EXPERIMENTAL DATA

_exptl_special_details
; ?
;

# This following item is used to identify the equipment used to record the
# powder pattern when the diffractogram was measured at a laboratory
# other than the authors home institution e.g. when neutron or synchrotron
# radiation is used.

_pd_instr_location
; ?
;

_diffrn_ambient_temperature      298
_diffrn_source_target            Cu
_diffrn_source_type              'sealed X-ray tube'
_diffrn_measurement_device_type  'Bruker AXS D8 Advance'
_diffrn_detector_type            'Linear PSD Bruker AXS Lynxeye'

_pd_meas_scan_method      'cont'  # options are step or cont
                                  # tof or fixed or
                                  # disp (= dispersive)
_pd_meas_special_details
; ?
;
# The following six items are used for angular dispersive measurements only.

loop_
    _diffrn_radiation_type     'Cu K\a'
#   _diffrn_radiation_wavelength
;
       CuK\a~1~ 1.54056
       CuK\a~2~ 1.54439
;

    _diffrn_radiation_monochromator 'Ni filter'

# The following four items give details of the measured (not processed)
# powder pattern.  Angles are in degrees.

_pd_meas_number_of_points       5001
_pd_meas_2theta_range_min       5
_pd_meas_2theta_range_max       105
_pd_meas_2theta_range_inc       0.02

# The following three items are used for time-of-flight measurements only.

_pd_instr_dist_src/spec           ?
_pd_instr_dist_spec/detc          ?
_pd_meas_2theta_fixed             ?

# The following fields are used to identify the programs used.

_computing_data_collection        ?
_computing_cell_refinement        'TOPAS-R'
_computing_data_reduction         ?
_computing_structure_solution     'TOPAS-R'
_computing_structure_refinement   'TOPAS-R'
_computing_molecular_graphics     'Schakal99'
_computing_publication_material   'TOPAS-R'


# 4.1.4 REFINEMENT DATA

# Use the next field to give any special details about the fitting of the
# powder pattern.

_pd_proc_ls_special_details
;
  The use of a rigid body description for the asymmetric unit
  does not allow the derivation of statistically meaningful s.u.'s
  for its atoms.


  Only center of mass (X, Y, Z) and rotational angles (RX, RY, RZ) su's are available 
 

 For the rigid body described by:

 point_for_site   c1   ux = -r1/2;    uy = r1 Sin(Deg a1);                   uz = 0;    
 point_for_site   h1   ux = -r1/2 - r4 Cos(Deg a1);    uy = r1 Sin(Deg a1) + r4 Sin(Deg a1);  uz = 0;    
 point_for_site   c2   ux = r1;        uy = 0;                                uz = 0;    
 point_for_site   c3   ux = r1 + r2;   uy = 0;                                uz = 0;    
 point_for_site   c4   ux = r1 + r2 + r3 Cos(Deg a2);  uy = r3 Sin(Deg a2);   uz = 0;    
 point_for_site   h4   ux = r1 + r2 + r3 Cos(Deg a2) - r4 Cos(Deg a3);  uy = r3 Sin(Deg a2) + r4 Sin(Deg a3);   uz = 0;    
 point_for_site   n1   ux = r1 + r2 + r3/(2 Sin(Deg 36)) + r3/(2 Tan(Deg 36));   uy = r3 / 2;   uz = 0;    

prm !r1  1.39
prm !r2  1.45
prm !r3 1.36
prm !r4 0.95
prm !a1 60
prm !a2 54
prm !a3 72

  X, Y, Z:      0,5, 0, 0
  
  RX, RY, RZ:   90, 0, 0
  

and (disordered):

 point_for_site   c1   ux = r1 Cos(Deg 180);    uy = r1 Sin(Deg 180);                   uz = 0;    
 point_for_site   h1   ux = (r1+r4) Cos(Deg 180);    uy = (r1+r4) Sin(Deg 180);                   uz = 0;    
 point_for_site   c2   ux = r1 Cos(Deg 120);    uy = r1 Sin(Deg 120);                   uz = 0;    
 point_for_site   h2   ux = (r1+r4) Cos(Deg 120);    uy = (r1+r4) Sin(Deg 120);                   uz = 0;    
 point_for_site   c3   ux = r1 Cos(Deg 60);    uy = r1 Sin(Deg 60);                   uz = 0;    
 point_for_site   h3   ux = (r1+r4) Cos(Deg 60);    uy = (r1+r4) Sin(Deg 60);                   uz = 0;    
 point_for_site   c4   ux = r1 Cos(Deg 240);    uy = r1 Sin(Deg 240);                   uz = 0;    
 point_for_site   h4   ux = (r1+r4) Cos(Deg 240);    uy = (r1+r4) Sin(Deg 240);                   uz = 0;    
 point_for_site   c5   ux = r1 Cos(Deg 300);    uy = r1 Sin(Deg 300);                   uz = 0;    
 point_for_site   h5   ux = (r1+r4) Cos(Deg 300);    uy = (r1+r4) Sin(Deg 300);                   uz = 0;    
 point_for_site   c6   ux = r1 Cos(Deg 0);    uy = r1 Sin(Deg 0);                   uz = 0;    
 point_for_site   c7   ux = (r1+r2) Cos(Deg 60);    uy = (r1+r2) Sin(Deg 60);                   uz = 0;    
 point_for_site   n1   ux = (r1+r2+1.15) Cos(Deg 60);    uy = (r1+r2+1.15) Sin(Deg 60);                   uz = 0;    

  X, Y, Z:     0.7152(4), 0.568(1), 0.801(1)

  RX, RY, RZ:   26.7(7), -59.2(9), 341.3(9)
;

# The next three items are given as text

_pd_proc_ls_profile_function      'fundamental parameters approach' 
_pd_proc_ls_background_function   'Chebychev polynomial'
_pd_proc_ls_pref_orient_corr       'r = 0.93 on (001)'

      
_pd_proc_ls_prof_R_factor         0.059
_pd_proc_ls_prof_wR_factor        0.074
_pd_proc_ls_prof_wR_expected      0.023

_refine_special_details
; ?
;

_refine_ls_structure_factor_coef     Inet
_refine_ls_matrix_type               full
_refine_ls_weighting_scheme          1/[Y~i~]
_refine_ls_hydrogen_treatment        ?
_refine_ls_extinction_method         none
_refine_ls_extinction_coef           ?
_refine_ls_number_parameters         33
_refine_ls_number_restraints         0
_refine_ls_number_constraints        0

# The following item is CHI squared
_refine_ls_goodness_of_fit_all       ?

_refine_ls_restrained_S_all          ?
_refine_ls_restrained_S_obs          ?
_refine_ls_shift/su_max            .01
_refine_ls_shift/su_mean             ?

# The following four items apply to angular dispersive measurements.
# 2theta minimum maximum and increment (in degrees) are for the
# intensities used in the refinement.

_pd_proc_2theta_range_min          5
_pd_proc_2theta_range_max          105
_pd_proc_2theta_range_inc          0.02

loop_
#     _pd_proc_wavelength
#       CuK\a~1~ 1.54056
#       CuK\a~2~ 1.54439
#

_pd_block_diffractogram_id        ?        # The id used for the block
                                              # containing the powder
                                              # pattern profile (section 11).

# Give appropriate details in the next two text fields.

_pd_proc_info_excluded_regions    ?
_pd_proc_info_data_reduction      ?


# 4.1.5 ATOMIC COORDINATES AND DISPLACEMENT PARAMETERS

loop_
_atom_site_label
_atom_site_type_symbol
_atom_site_symmetry_multiplicity
_atom_site_fract_x
_atom_site_fract_y
_atom_site_fract_z
_atom_site_occupancy
_atom_site_B_iso_or_equiv
Zn Zn   2 0 0 0.25 1 5.80(19)
C1 C   8 0.4476094 0 0.1660973 1 7.80(19)
H1 H   8 0.4118028 0 0.2796171 1 7.80(19)
C2 C   4 0.6047813 0 0 1 7.80(19)
C3 C   4 0.7140855 0 0 1 7.80(19)
C4 C   8 0.7743451 0 0.1518147 1 7.80(19)
H4 H   8 0.7522154 0 0.2764804 1 7.80(19)
N1 N   8 0.8718472 0 0.09382662 1 7.80(19)
C11 C  16 0.6644562 0.5848552 0.6356896 0.25 27.19(75)
H11 H  16 0.6297752 0.5965937 0.5230358 0.25 27.19(75)
C12 C  16 0.682648 0.6642942 0.7562416 0.25 27.19(75)
H12 H  16 0.6604002 0.7303255 0.7259794 0.25 27.19(75)
C13 C  16 0.7333918 0.647119 0.9210719 0.25 27.19(75)
H13 H  16 0.745825 0.7014118 1.003464 0.25 27.19(75)
C14 C  16 0.6970082 0.488241 0.6799681 0.25 27.19(75)
H14 H  16 0.684575 0.4339482 0.5975764 0.25 27.19(75)
C15 C  16 0.747752 0.4710658 0.8447984 0.25 27.19(75)
H15 H  16 0.7699998 0.4050345 0.8750606 0.25 27.19(75)
C16 C  16 0.7659438 0.5505048 0.9653504 0.25 27.19(75)
C17 C  16 0.7523688 0.729987 1.046828 0.25 27.19(75)
N18 N  16 0.7674195 0.7957099 1.146565 0.25 27.19(75)
